# Supplementary material for: Sorbitol as a Chain Extender of Polyurethane Prepolymers to Prepare Self-Healable and Robust Polyhydroxyurethane Elastomers
Source: PubMed Central journal article supplement (PMC6222304; doi:10.3390/molecules23102515), 2018-09-30
Supplement: molecules-23-02515-s001.pdf [file molecules-23-02515-s001.pdf]

## Supplementary Material

### Sorbitol as a chain extender of polyurethane prepolymers to prepare self-healable and robust polyhydroxyurethane elastomers

Sang-Hyub Lee, Se-Ra Shin and Dai-Soo Lee\*

Department of Semiconductor and Chemical Engineering, Chonbuk National University, 567 Baekje-daero, Deokjini-gu, Jeonju-si, Chonbuk, 54896, Republic of Korea

\* Correspondence: daisoolee@jbnu.ac.kr; Tel.: +82-63-270-2431

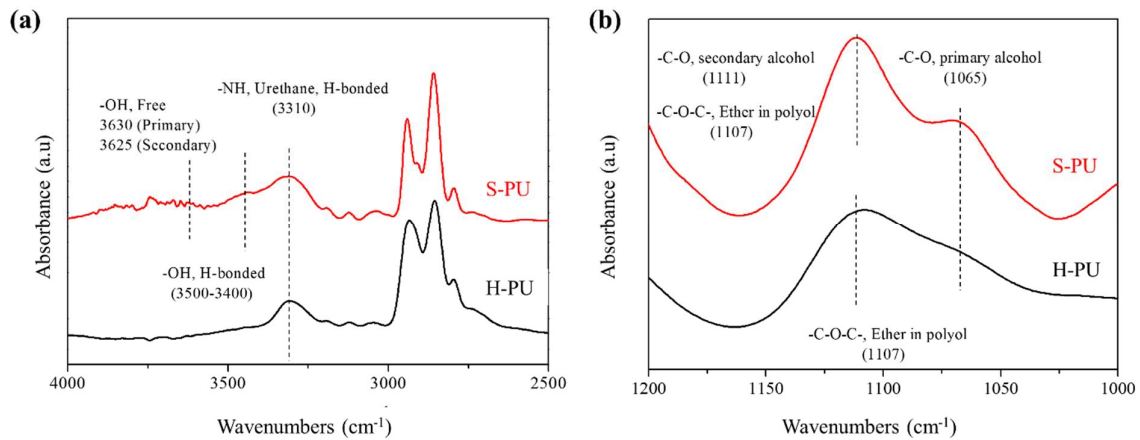

**Figure S1.** Enlarged views of the FT-IR spectra of S-PU and H-PU: (a) from 4000 to 2500  $\text{cm}^{-1}$ ; (b) from 1200 to 1000  $\text{cm}^{-1}$ .

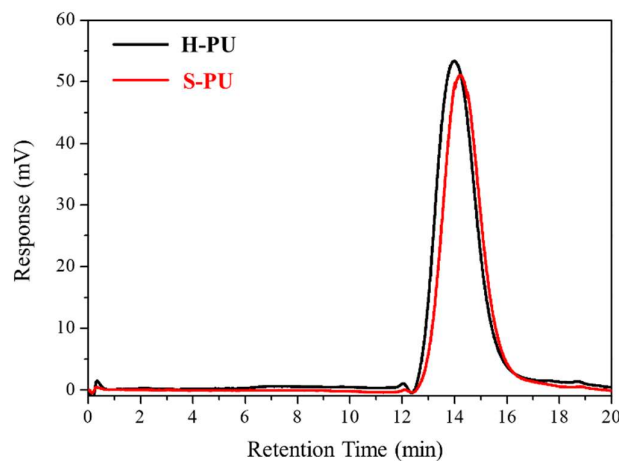

**Figure S2.** GPC traces of the synthesized S-PU and H-PU.

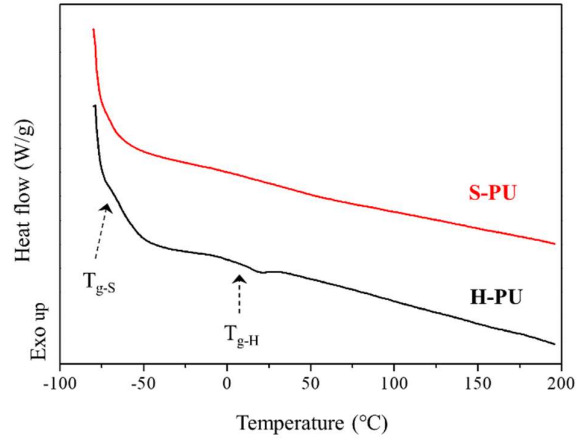

**Figure S3.** DSC thermogram of S-PU and H-PU.

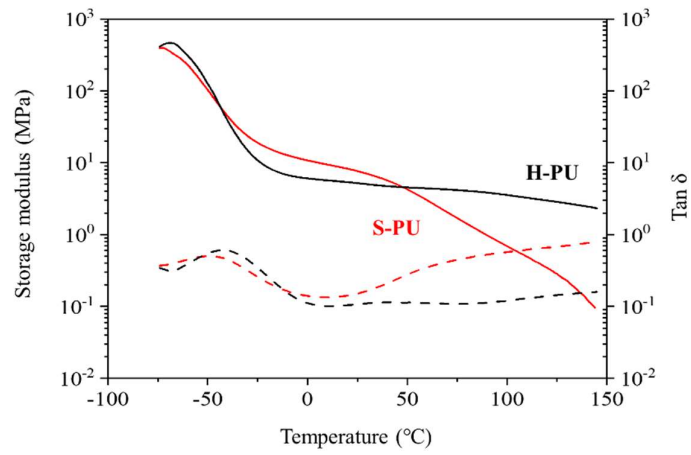

**Figure S4.** Storage moduli (solid lines) and  $\tan \delta$  values (dotted lines) of S-PU (red) and H-PU (black) obtained in the DMA measurements.

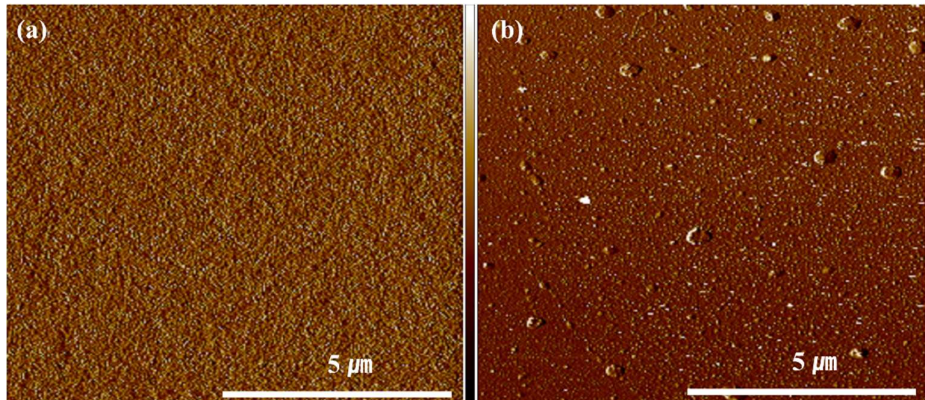

**Figure S5.** AFM images in the phase mode: (a) S-PU; (b) H-PU.

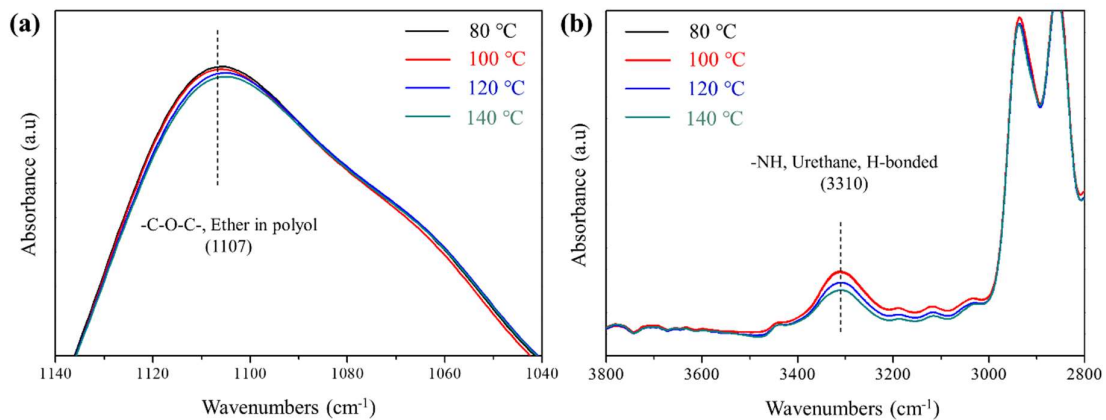

**Figure S6.** Temperature dependent FT-IR spectra of H-PU: (a) Absorbance at low wavenumbers (1140–1040  $\text{cm}^{-1}$ ); (b) Absorbance at high wavenumbers (3800–2800  $\text{cm}^{-1}$ ).

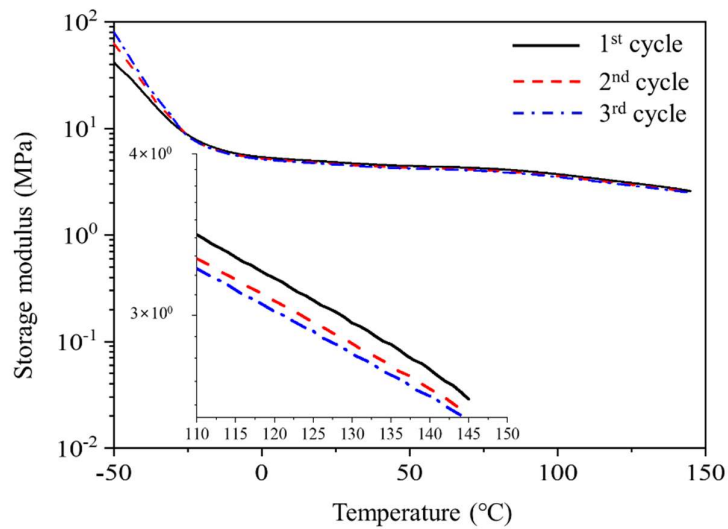

**Figure S7.** Storage modulus versus temperature curves of H-PU in repeated DMA measurements.

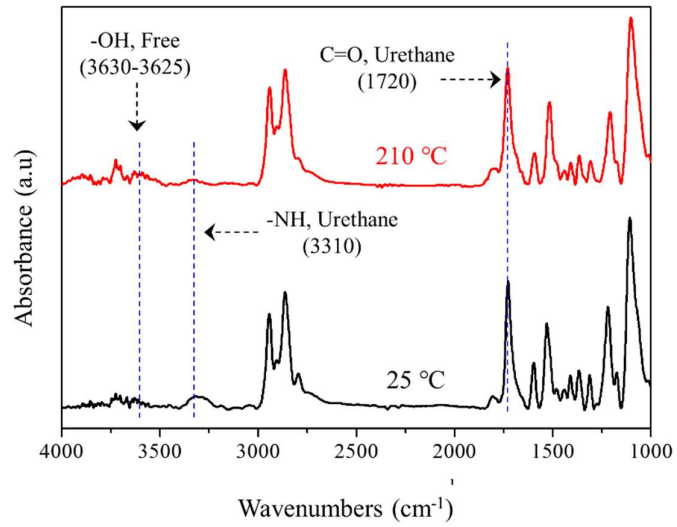

**Figure S8.** Normalized FT-IR spectra of S-PU at 25 °C (black) and 210 °C (red).

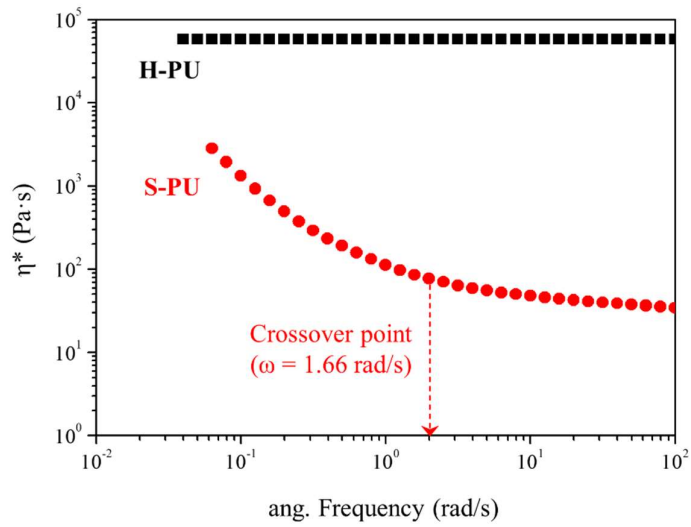

**Figure S9.** Complex viscosity versus angular frequency of S-PU and H-PU at 180 °C.

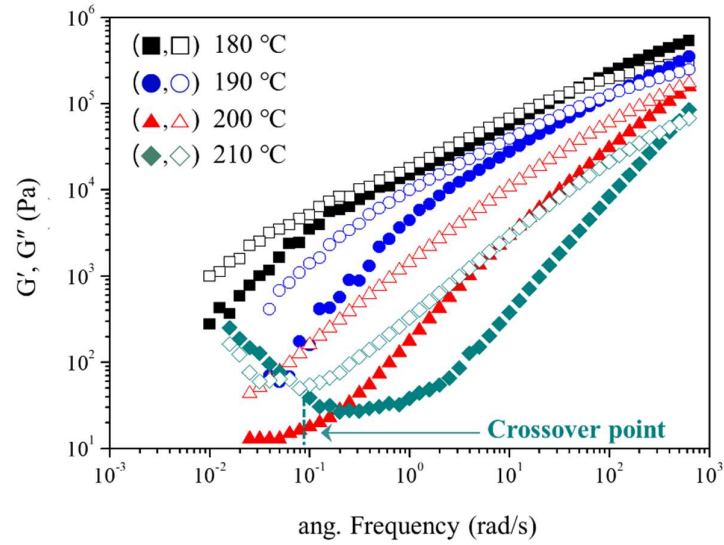

**Figure S10.**  $G'$  (filled symbols) and  $G''$  (open symbols) of H-PU versus angular frequency at 180 °C, 190 °C, 200 °C and 210 °C.

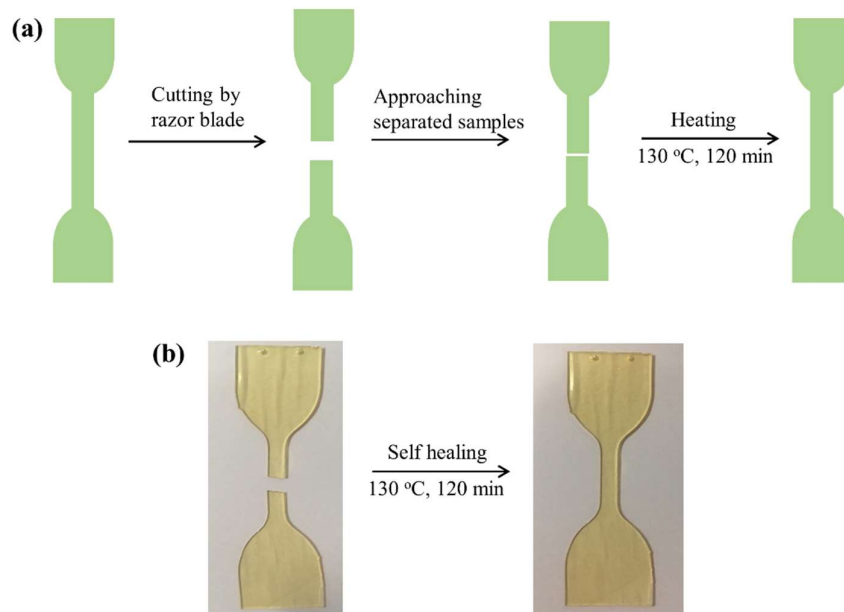

**Figure S11.** Preparation of specimens for self-healing tests by UTM: (a) schematic for the preparation of the sample specimens; (b) digital camera images of the S-PU sample after cutting (left) and self-healing at 130 °C for 120 min.

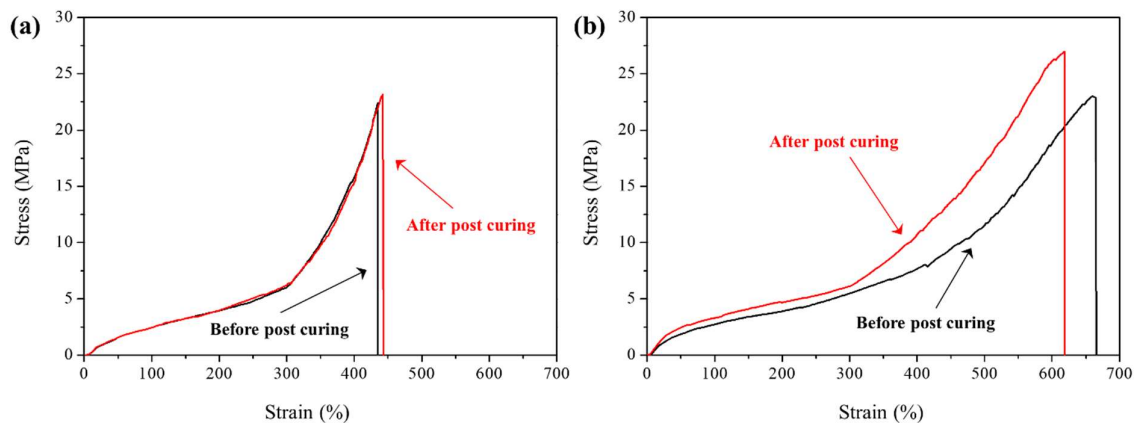

**Figure S12.** Effects of post curing at 130 °C for 120 min: (a) tensile properties of H-PU before (black) and after (red) post curing; (b) tensile properties of S-PU before (black) and after (red) post curing.

**Table S1.** Tensile properties and gel fraction of S-PU and H-PU after post curing at 130 °C for 120 min

|                                | S-PU       |                 | H-PU       |                 |
|--------------------------------|------------|-----------------|------------|-----------------|
|                                | Uncut S-PU | Post cured S-PU | Uncut H-PU | Post cured H-PU |
| $\sigma$ (MPa)                 | 22.92      | 26.91           | 22.53      | 22.85           |
| $\varepsilon$ (%)              | 658.3      | 619.5           | 433.8      | 434.5           |
| $E$ (MPa)                      | 4.447      | 5.952           | 4.655      | 4.641           |
| Gel- fraction <sup>a</sup> (%) | 25.42      | 54.94           | 35.78      | 35.42           |

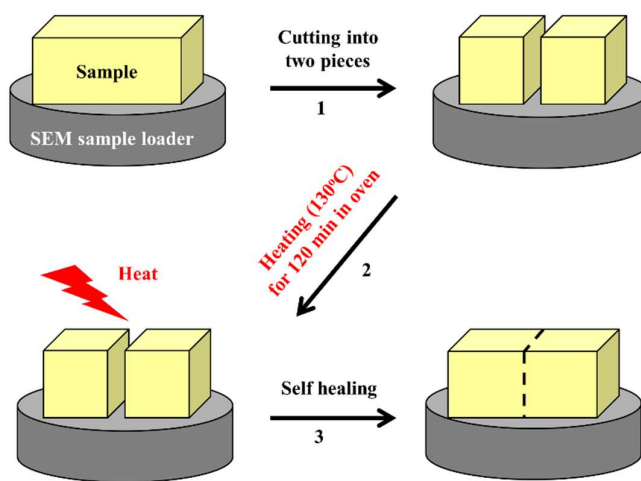

**Figure S13.** Schematic of the sample preparation to observe the self-healing effects by SEM.

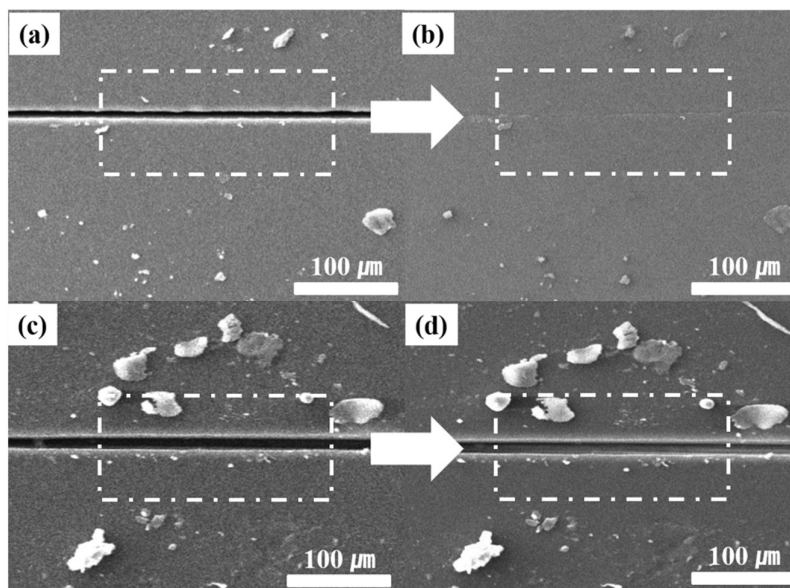

**Figure S14.** SEM images of the PUs after cutting and heating to 130 °C for 120 min: (a) cut S-PU; (b) self-healed S-PU after heating; (c) cut H-PU; (d) unhealed H-PU after heating.
